# Supplementary material for: Global Health Effects of Future Atmospheric Mercury Emissions
Source: Research Square preprint supplement (doi:10.21203/rs.3.rs-136067/v1), 2021-01-12
Supplement: Supplementary file 1 [file 566588fb4f2ff1ea2aa90901.xlsx]

## Sheet: Sheet1
		MeHg exposure										Fractions
alpha3	continent	FW fish	Seafood	Rice	newborn_2010	GDP_2010	IHD_Male	IHD_Female	Male_2010	Female_2010	Total Exposure	FW fish	Seafood	Rice	IQ decrease	blood Hg	hair Hg	TIQ	MIQ	HAI	HAM	Total Loss
		ug/day			x1000 for 5 years	x1000 USD per capita	per 100000	per 100000	x1000	x1000	ug/day	%			points	ug/L	ug/g	points	USD		USD	USD
AFG	AS	0.00887653	0.0527154	0.062251	5828	1.185	345.514	264.992	14933	14251	0.123843	0.0716757	0.425663	0.502661	0.00445835	0.0743058	0.013375	5196.65	3.37539e+06	13.1413	3.15161e+06	6.527e+06
AGO	AF	0.202004	2.72711	0.0321417	5004	5.172	116.321	112.305	11550	11807	2.96125	0.0682158	0.92093	0.0108541	0.106605	1.77675	0.319815	106690	3.02458e+08	92.9278	9.72705e+07	3.99729e+08
ALB	EU	0.129051	0.680313	0.0301009	179	7.661	225.879	143.54	1487	1463	0.839464	0.15373	0.810413	0.0358573	0.0302207	0.503679	0.0906622	1081.9	4.54313e+06	5.42772	8.4155e+06	1.29586e+07
ANT	SA	1.06916	3.75491	0.138213							4.96229	0.215457	0.75669	0.0278527	0.178642	2.97737	0.535927
ARE	AS	0.150355	4.0754	0.234809	418	42.351	195.489	156.52	6394	2155	4.46057	0.0337076	0.913651	0.0526411	0.16058	2.67634	0.481741	13424.5	3.11634e+08	82.7883	7.09593e+08	1.02123e+09
ARG	SA	0.0247587	0.767964	0.0340289	3667	14.363	128.061	68.701	19898	20998	0.826752	0.0299469	0.928893	0.0411597	0.0297631	0.496051	0.0892892	21828.2	1.71848e+08	39.081	1.13602e+08	2.85451e+08
ARM	AS	0.248802	0.258892	0.0144136	221	4.901	272.52	167.886	1346	1531	0.522108	0.476534	0.495859	0.0276064	0.0187959	0.313265	0.0563877	830.779	2.23178e+06	3.86231	3.83097e+06	6.06275e+06
ATG	NA	0.158757	7.903	0.0404467	7		120.634	92.4675	41	48	8.1022	0.0195943	0.975414	0.00499206	0.291679	4.86132	0.875038	408.351		0.877702
AUS	OC	0.698573	3.17607	0.0459183	1461	35.728	73.2696	40.9376	11079	11074	3.92056	0.178182	0.810106	0.0117122	0.14114	2.35234	0.423421	41241.2	8.07647e+08	58.1078	4.20165e+08	1.22781e+09
AUT	EU	0.832421	1.64103	0.0152379	387	35.365	117.902	67.2724	4098	4311	2.48869	0.334482	0.659395	0.00612288	0.0895928	1.49321	0.268778	6934.48	1.34422e+08	22.6578	1.62169e+08	2.96591e+08
AZE	AS	0.055777	0.332273	0.00876746	734	8.783	395.003	267.013	4477	4557	0.396818	0.140561	0.837345	0.0220944	0.0142854	0.238091	0.0428563	2097.1	1.00959e+07	14.053	2.49797e+07	3.50756e+07
BEL	EU	1.36718	2.72423	0.164786	626	33.389	81.2116	43.253	5370	5567	4.2562	0.321222	0.640062	0.0387168	0.153223	2.55372	0.45967	19183.6	3.51087e+08	33.7124	2.27808e+08	5.78895e+08
BEN	AF	0.875362	1.66067	0.226399	1720	1.424	147.434	122.269	4569	4631	2.76244	0.316881	0.601163	0.0819563	0.0994477	1.65746	0.298343	34210	2.67021e+07	40.2913	1.16118e+07	3.83138e+07
BFA	AF	0.175157	0.955132	0.0887476	3173	1.136	201.323	168.938	7738	7869	1.21904	0.143685	0.783514	0.0728014	0.0438853	0.731422	0.131656	27849.6	1.73412e+07	41.632	9.57154e+06	2.69127e+07
BGD	AS	1.78975	0.531153	0.392935	16058	1.488	113.744	99.5657	75015	72561	2.71384	0.659491	0.19572	0.144789	0.0976982	1.6283	0.293095	313768	2.55913e+08	503.133	1.51517e+08	4.07431e+08
BGR	EU	0.232673	0.71626	0.00954003	381	11.574	317.971	197.035	3616	3808	0.958473	0.242754	0.747293	0.00995336	0.034505	0.575084	0.103515	2629.28	1.66803e+07	21.562	5.05067e+07	6.71869e+07
BHS	NA	0.203699	4.84624	0.09359	26	28.125	104.647	59.6693	173	182	5.14353	0.0396029	0.942201	0.0181957	0.185167	3.08612	0.555502	962.869	1.48437e+07	1.73779	9.8916e+06	2.47353e+07
BIH	EU	0.14957	0.617775	0.00770303	175	7.464	207.417	137.242	1818	1886	0.775048	0.192982	0.79708	0.00993879	0.0279017	0.465029	0.0837052	976.56	3.99533e+06	5.83916	8.82061e+06	1.28159e+07
BLR	EU	0.393288	2.21092	0.0123351	514	12.368	596.406	285.775	4378	5038	2.61654	0.150308	0.844977	0.00471428	0.0941956	1.56993	0.282587	9683.31	6.56455e+07	124.75	3.12261e+08	3.77907e+08
BLZ	NA	0.196648	1.30621	0.124893	37	6.606	181.456	125.806	160	162	1.62775	0.120809	0.802463	0.0767276	0.0585991	0.976651	0.175797	433.633	1.57016e+06	0.950019	1.27013e+06	2.84028e+06
BMU	NA	0.999784	6.32963	0.0223921							7.35181	0.135992	0.860963	0.00304579	0.264665	4.41108	0.793995
BOL	SA	0.145712	0.251522	0.110185	1264	4.349	136.168	98.6022	5056	4993	0.507418	0.287163	0.49569	0.217147	0.0182671	0.304451	0.0548012	4617.91	1.10082e+07	7.10506	6.25366e+06	1.72619e+07
BRA	SA	0.777268	0.975328	0.187055	15331	10.093	126.029	76.1164	96535	99178	1.93965	0.400726	0.502837	0.0964374	0.0698275	1.16379	0.209482	214105	1.18448e+09	451.174	9.21598e+08	2.10608e+09
BRB	NA	0.169964	6.95891	0.0634727	17	17.597	103.853	60.5782	135	147	7.19235	0.0236312	0.967544	0.00882503	0.258924	4.31541	0.776773	880.343	8.49126e+06	1.90947	6.80031e+06	1.52916e+07
BRN	AS	0.366409	5.28988	0.319276	33	45.496	114.404	83.6272	200	185	5.97557	0.0613179	0.885252	0.0534303	0.21512	3.58534	0.645361	1419.79	3.54063e+07	2.66542	2.45423e+07	5.99486e+07
BTN	AS	0.398228	0.0417546	0.362822	70	4.78	163.079	150.852	360	325	0.802805	0.496046	0.0520108	0.451944	0.028901	0.481683	0.0867029	404.614	1.06011e+06	1.02457	991170	2.05128e+06
BWA	AF	0.0130346	0.655455	0.0411617	267	12.462	140.485	139.043	969	1014	0.709651	0.0183677	0.92363	0.0580028	0.0255474	0.425791	0.0766423	1364.23	9.31876e+06	2.3304	5.87753e+06	1.51963e+07
CAF	AF	1.60141	0.234966	0.0279048	841	0.708	151.236	133.637	2172	2214	1.86428	0.858996	0.126036	0.0149681	0.0671141	1.11857	0.201342	11288.6	4.38081e+06	13.7366	1.96829e+06	6.3491e+06
CAN	NA	1.29463	2.29377	0.102939	1847	35.332	79.6633	40.3935	16942	17206	3.69134	0.350721	0.621392	0.0278866	0.132888	2.21481	0.398665	49089	9.50679e+08	88.4957	6.32802e+08	1.58348e+09
CHE	EU	1.22195	1.84527	0.00109638	383	38.376	79.8628	43.124	3843	3963	3.06832	0.398248	0.601394	0.000357323	0.11046	1.84099	0.331379	8461.2	1.77981e+08	17.228	1.33805e+08	3.11786e+08
CHL	SA	0.147507	1.41252	0.0361291	1233	13.614	76.0982	39.9596	8397	8665	1.59615	0.0924143	0.884951	0.0226351	0.0574615	0.957692	0.172385	14170	1.0574e+08	18.5766	5.11835e+07	1.56923e+08
CHN	AS	1.54076	1.20669	0.388772	86434	6.8	114.797	105.616	703415	665394	3.13622	0.491279	0.384759	0.123962	0.112904	1.88173	0.338712	1.95175e+06	7.27469e+09	5564.54	7.658e+09	1.49327e+10
CIV	AF	0.0921741	3.09246	0.262005	3699	1.694	240.533	220.28	10427	10106	3.44664	0.0267432	0.897239	0.0760176	0.124079	2.06798	0.372237	91793.7	8.5233e+07	191.485	6.56485e+07	1.50882e+08
CMR	AF	0.581646	2.26229	0.0917838	3835	2.058	150.584	111.998	10154	10188	2.93572	0.198127	0.770608	0.0312645	0.105686	1.76143	0.317058	81061.1	9.14407e+07	92.1548	3.83831e+07	1.29824e+08
COD	AF	1.6113	2.85459	0.0735901	13538	0.316	102.933	105.121	32142	32422	4.53948	0.354953	0.628836	0.0162111	0.163421	2.72369	0.490264	442480	7.66412e+07	356.429	2.27948e+07	9.94361e+07
COG	AF	1.67881	2.89035	0.0738074	748	3.808	119.161	133.062	2126	2147	4.64296	0.361581	0.622522	0.0158966	0.167147	2.78578	0.50144	25005.2	5.21925e+07	29.2449	2.25385e+07	7.4731e+07
COL	SA	0.321026	0.601922	0.114106	3909	8.479	154.303	93.714	22161	23063	1.03706	0.309556	0.580415	0.110029	0.037334	0.622233	0.112002	29187.7	1.35652e+08	68.5036	1.17553e+08	2.53205e+08
CPV	AF	0.00682545	2.06608	0.204944	55	3.474	212.633	161.245	244	247	2.27785	0.00299645	0.907031	0.0899726	0.0820026	1.36671	0.246008	902.029	1.71764e+06	2.46171	1.73079e+06	3.44843e+06
CRI	NA	0.668931	1.08776	0.194172	358	10.452	99.9895	61.0082	2292	2284	1.95086	0.34289	0.557578	0.0995316	0.070231	1.17052	0.210693	5028.54	2.88086e+07	8.48176	1.79416e+07	4.67503e+07
CUB	NA	0.30148	0.553503	0.263269	622	5.747	133.632	91.0435	5583	5642	1.11825	0.2696	0.494971	0.235429	0.0402571	0.670951	0.120771	5007.98	1.57756e+07	16.6689	1.93876e+07	3.51632e+07
CYP	AS	1.18463	1.94901	0.0210673	63	18.901	129.645	68.016	555	558	3.15471	0.375511	0.617811	0.00667803	0.11357	1.89283	0.340709	1430.98	1.48251e+07	4.07308	1.55806e+07	3.04058e+07
CZE	EU	1.81172	1.00721	0.0187387	562	23.696	206.391	124.137	5171	5364	2.83768	0.638453	0.354943	0.00660354	0.102156	1.70261	0.306469	11482.4	1.49138e+08	57.8392	2.7738e+08	4.26518e+08
DEU	EU	0.838545	1.62714	0.0132951	3393	33.138	114.678	66.6485	39617	41209	2.47898	0.338261	0.656375	0.00536311	0.0892434	1.48739	0.26773	60560.6	1.10001e+09	212.799	1.42716e+09	2.52718e+09
DJI	AF	0.00428788	0.553309	0.181542	108	2.119	140.984	107.283	446	392	0.73914	0.00580118	0.748586	0.245613	0.026609	0.443484	0.0798271	574.755	667568	0.918999	394115	1.06168e+06
DMA	NA	0.0184421	4.28489	0.0334915							4.33682	0.00425244	0.988025	0.00772258	0.156126	2.60209	0.468377
DNK	EU	0.225509	4.09977	0.0212506	322	32.463	75.1186	40.6746	2756	2799	4.34653	0.0518825	0.943228	0.00488909	0.156475	2.60792	0.469425	10077	1.79309e+08	16.3149	1.07189e+08	2.86498e+08
DOM	NA	0.067001	1.54916	0.206649	1034	8.387	166.802	123.487	4867	4831	1.82281	0.036757	0.849875	0.113368	0.0656212	1.09369	0.196863	13570.5	6.23854e+07	30.3014	5.14334e+07	1.13819e+08
DZA	AF	0.0274766	0.704751	0.0104874	3986	7.564	168.158	144.019	18161	17817	0.742715	0.0369947	0.948885	0.0141204	0.0267377	0.445629	0.0802132	21315.3	8.83742e+07	49.456	7.5709e+07	1.64083e+08
ECU	SA	0.171038	0.93464	0.184932	1594	7.201	64.3057	44.1323	7521	7492	1.29061	0.132525	0.724185	0.14329	0.046462	0.774366	0.139386	14812.1	5.84643e+07	12.4277	1.81117e+07	7.6576e+07
EGY	AF	1.57032	1.51422	0.0578601	10015	5.544	317.282	230.109	41805	40958	3.1424	0.499721	0.481866	0.0184127	0.113126	1.88544	0.339379	226592	6.88573e+08	837.596	9.39798e+08	1.62837e+09
ERI	AF	0.00772268	0.512579	0.0660451	564	0.49	139.375	101.103	1583	1585	0.586347	0.0131708	0.874191	0.112638	0.0211085	0.351808	0.0633254	2381.04	639505	2.64759	262557	902062
ESH	AF	0.0920266	2.73356	0.0050742	50				255	227	2.83066	0.0325107	0.965697	0.00179258	0.101904	1.6984	0.305711	1019.04
ESP	EU	1.10678	4.55051	0.0291765	2565	26.961	62.9619	32.5823	23195	23733	5.68647	0.194634	0.800235	0.00513087	0.204713	3.41188	0.614138	105018	1.55196e+09	147.879	8.06902e+08	2.35886e+09
EST	EU	0.689219	2.07803	0.0101493	78	16.594	287.873	150.444	618	715	2.7774	0.248152	0.748193	0.00365425	0.0999864	1.66644	0.299959	1559.79	1.41873e+07	9.32669	3.13224e+07	4.55097e+07
ETH	AF	0.0243225	0.00183431	0.00666251	15288	0.932	129.522	101.725	43727	43913	0.0328193	0.741103	0.0558913	0.203005	0.0011815	0.0196916	0.00354449	3612.54	1.84549e+06	3.94942	744949	2.59043e+06
FIN	EU	3.20744	3.69558	0.0184235	298	31.7	136.034	60.9798	2633	2732	6.92145	0.463407	0.533931	0.0026618	0.249172	4.15287	0.747516	14850.7	2.5804e+08	42.1034	2.70118e+08	5.28158e+08
FJI	OC	0.190182	6.3116	0.191184	94	4.152	326.858	157.267	438	420	6.69297	0.0284152	0.94302	0.028565	0.240947	4.01578	0.722841	4529.8	1.0309e+07	16.2447	1.36504e+07	2.39594e+07
FRA	EU	0.851829	3.86999	0.0268457	3975	29.596	55.4032	26.501	30458	32423	4.74867	0.179383	0.814964	0.00565331	0.170952	2.8492	0.512856	135907	2.20473e+09	141.267	8.46154e+08	3.05089e+09
GAB	AF	1.46857	4.73781	0.145738	248	13.615	94.5478	96.5446	822	802	6.35212	0.231193	0.745863	0.0229432	0.228676	3.81127	0.686029	11342.3	8.46452e+07	11.4468	3.15412e+07	1.16186e+08
GBR	EU	1.24163	2.60715	0.0355306	3880	32.47	89.27	42.6322	31176	32285	3.88431	0.319654	0.671199	0.00914721	0.139835	2.33059	0.419506	108512	1.93127e+09	189.308	1.24402e+09	3.17529e+09
GEO	AS	0.0519831	1.72138	0.00929829	275	4.651	368.698	202.954	1955	2145	1.78266	0.0291604	0.965624	0.00521596	0.0641758	1.0696	0.192527	3529.67	8.99833e+06	24.3299	2.29015e+07	3.18998e+07
GHA	AF	0.552902	3.83135	0.12906	3836	1.478	133.387	180.255	12533	12246	4.51331	0.122505	0.8489	0.0285953	0.162479	2.70799	0.487438	124654	1.00986e+08	204.682	6.12254e+07	1.62212e+08
GIN	AF	0.311352	1.53445	0.40543	1970	0.978	192.848	181.596	4860	5335	2.25123	0.138303	0.681605	0.180093	0.0810444	1.35074	0.243133	31931.5	1.71175e+07	50.5699	1.00094e+07	2.71269e+07
GMB	AF	0.563738	4.12801	0.273736	344	1.834	240.57	202.652	890	904	4.96549	0.113531	0.831341	0.0551277	0.178757	2.97929	0.536272	12298.5	1.23633e+07	23.0271	8.54702e+06	2.09103e+07
GNB	AF	0.0193349	0.250081	0.397057	286	1.064	198.612	181.22	736	785	0.666474	0.0290108	0.375231	0.595758	0.0239931	0.399884	0.0719792	1372.4	800396	2.27834	490610	1.29101e+06
GNQ	AF	1.45936	4.78691	0.145613	165	30.769	160.089	137.406	513	430	6.39189	0.228315	0.748904	0.0227809	0.230108	3.83513	0.690324	7593.56	1.28068e+08	10.4823	6.52749e+07	1.93343e+08
GRC	EU	0.421709	1.86869	0.0262628	562	24.113	118.293	71.8808	5347	5536	2.31666	0.182033	0.806631	0.0113365	0.0833998	1.39	0.2502	9374.14	1.23898e+08	28.127	1.37262e+08	2.6116e+08
GRD	NA	0.0267067	5.465	0.0384549	9		145.337	99.0514	51	51	5.53016	0.00482929	0.988217	0.00695368	0.199086	3.31809	0.597257	358.354		0.802923
GRL	NA	0.670502	16.0432	0.0149254	3.10408	25.4947	75.1186	40.6746	28.5	28.5	16.7287	0.0400811	0.959027	0.000892207	0.602232	10.0372	1.8067	373.875	5.22466e+06	0.618258	3.19004e+06	8.4147e+06
GTM	NA	0.0898767	0.116217	0.022713	2022	4.297	89.8199	68.0607	7185	7443	0.228807	0.392806	0.507927	0.0992673	0.00823705	0.137284	0.0247111	3331.06	7.84567e+06	3.12866	2.72082e+06	1.05665e+07
GUY	SA	0.110233	5.13964	0.325093	80	3.106	239.305	192.655	369	380	5.57497	0.0197728	0.921914	0.0583129	0.200699	3.34498	0.602096	3211.18	5.46699e+06	10.4873	6.59238e+06	1.20594e+07
HND	NA	0.134958	0.30503	0.0639441	1067	3.518	167.328	85.7764	4148	4166	0.503932	0.26781	0.6053	0.12689	0.0181415	0.302359	0.0544246	3871.4	7.46528e+06	6.28325	4.4736e+06	1.19389e+07
HRV	EU	0.209183	2.40199	0.0105276	219	16.183	194.687	128.526	2084	2245	2.6217	0.0797889	0.916195	0.00401556	0.0943812	1.57302	0.283144	4133.9	3.66691e+07	21.4228	7.01635e+07	1.06833e+08
HTI	NA	0.124035	0.755285	0.180751	1371	0.992	185.113	158.959	4906	5043	1.06007	0.117006	0.712485	0.170509	0.0381626	0.636043	0.114488	10464.2	5.68982e+06	21.4514	4.3067e+06	9.99652e+06
HUN	EU	0.263423	0.407525	0.0110824	477	16.982	263.304	159.307	4711	5216	0.68203	0.386233	0.597518	0.0162491	0.0245531	0.409218	0.0736592	2342.36	2.18034e+07	16.7426	5.75424e+07	7.93458e+07
IDN	AS	1.06441	3.06922	1.65303	24938	3.877	197.905	190.487	121821	120015	5.78666	0.183942	0.530395	0.285662	0.20832	3.472	0.62496	1.03902e+06	2.208e+09	3163.31	2.48207e+09	4.69008e+09
IND	AS	0.415307	0.292133	0.284815	135812	2.983	195.074	123.945	642165	592116	0.992255	0.418549	0.294413	0.287038	0.0357212	0.595353	0.107164	970273	1.58646e+09	2333.53	1.40878e+09	2.99524e+09
IRL	EU	0.262554	2.66954	0.0133985	353	36.014	104.36	51.7899	2264	2290	2.9455	0.0891376	0.906314	0.0045488	0.106038	1.7673	0.318114	7486.27	1.47781e+08	12.2883	8.95655e+07	2.37347e+08
IRN	AS	0.542336	0.836735	0.112571	6392	10.954	219.16	186.571	37180	36581	1.49164	0.363583	0.560949	0.0754681	0.0536991	0.894986	0.161097	68649	4.12182e+08	263.933	5.85118e+08	9.97299e+08
IRQ	AS	0.212369	0.251458	0.159264	4737	3.231	270.462	214.314	15023	14721	0.623091	0.340831	0.403565	0.255604	0.0224313	0.373855	0.0672938	21251.4	3.76362e+07	53.3119	3.48609e+07	7.24971e+07
ISL	EU	0.625982	14.9057	0.014798	23	32.575	103.059	47.4035	162	160	15.5465	0.0402652	0.958783	0.000951857	0.559672	9.32787	1.67902	2574.49	4.59682e+07	4.24481	2.79846e+07	7.39529e+07
ISR	AS	0.957687	2.69249	0.0576465	735	26.711	63.2936	32.1808	3629	3719	3.70782	0.258288	0.726165	0.0155473	0.133482	2.22469	0.400445	19621.8	2.87284e+08	15.1879	8.21042e+07	3.69388e+08
ITA	EU	0.540508	2.61584	0.0240468	2856	27.105	75.3678	42.7319	28704	30622	3.1804	0.16995	0.822489	0.00756093	0.114494	1.90824	0.343483	65399.2	9.71635e+08	129.703	7.11503e+08	1.68314e+09
JAM	NA	0.150275	3.96282	0.107351	257	6.902	65.1052	51.3171	1398	1412	4.22045	0.0356064	0.938958	0.025436	0.151936	2.53227	0.455809	7809.52	2.95448e+07	8.0745	1.12789e+07	4.08237e+07
JOR	AS	0.0190084	1.06866	0.0906569	973	5.131	220.88	141.708	3704	3558	1.17832	0.0161317	0.906931	0.0769371	0.0424197	0.706995	0.127259	8254.87	2.32163e+07	18.4332	1.91416e+07	4.2358e+07
JPN	AS	2.86831	6.07787	0.154103	5571	30.816	49.9817	26.3272	62874	65667	9.10028	0.315189	0.667877	0.0169339	0.32761	5.46017	0.98283	365023	6.16564e+09	509.933	3.18029e+09	9.34593e+09
KAZ	AS	0.298874	0.653375	0.0326722	1707	11.118	471.11	284.017	7855	8399	0.984921	0.30345	0.663378	0.0331724	0.0354572	0.590953	0.106371	12105.1	7.37693e+07	70.9624	1.59673e+08	2.33442e+08
KEN	AF	0.353893	0.0307444	0.0430209	7297	1.481	49.8008	42.0761	20868	21160	0.427658	0.827513	0.0718902	0.100596	0.0153957	0.256595	0.0461871	22468.5	1.82394e+07	9.78843	2.9339e+06	2.11733e+07
KGZ	AS	0.0156418	0.377516	0.0287867	625	2.051	448.419	307.933	2679	2741	0.421944	0.0370707	0.894705	0.0682239	0.01519	0.253167	0.04557	1898.75	2.13459e+06	10.2374	4.24943e+06	6.38403e+06
KHM	AS	6.25483	1.05408	0.774364	1811	1.968	134.142	88.3894	6972	7341	8.08328	0.773799	0.130403	0.0957982	0.290998	4.84997	0.872994	105399	1.13696e+08	147.821	5.88759e+07	1.72572e+08
KIR	OC	0.107294	13.4154	0.236123	14		142.538	92.7299	51	51	13.7588	0.00779822	0.97504	0.0171616	0.495317	8.25529	1.48595	1386.89		1.86814
KNA	NA	0.173361	5.92254	0.0845313							6.18043	0.02805	0.958273	0.0136772	0.222496	3.70826	0.667487
KOR	AS	0.517236	6.88872	0.213194	2289	27.413	45.866	29.7411	24824	24719	7.61915	0.0678864	0.904132	0.0279814	0.274289	4.57149	0.822868	125570	1.88679e+09	165.08	9.15857e+08	2.80264e+09
KWT	AS	0.797001	2.16893	0.241575	275	45.618	254.654	189.335	1732	1261	3.20751	0.24848	0.676204	0.0753155	0.11547	1.9245	0.346411	6350.86	1.588e+08	25.6105	2.36446e+08	3.95246e+08
LAO	AS	2.35789	0.106844	0.900761	844	2.313	185.642	183.228	3100	3149	3.36549	0.700607	0.0317469	0.267646	0.121158	2.0193	0.363473	20451.4	2.59287e+07	45.53	2.13133e+07	4.7242e+07
LBN	AS	0.0913319	1.83186	0.0477106	376	12.618	292.183	164.638	2514	2437	1.9709	0.0463402	0.929452	0.0242075	0.0709524	1.18254	0.212857	5335.62	3.69026e+07	26.4074	6.74362e+07	1.04339e+08
LBR	AF	0.121214	0.651319	0.381448	686	0.482	170.887	153.398	1948	1943	1.15398	0.10504	0.564411	0.33055	0.0415433	0.692389	0.12463	5699.75	1.50586e+06	8.61427	840316	2.34617e+06
LBY	AF	2.63235	1.6276	0.16046	653	15.699	286.88	189.512	3165	3034	4.42041	0.5955	0.3682	0.0362997	0.159135	2.65225	0.477404	20783	1.78839e+08	76.6625	2.43574e+08	4.22413e+08
LCA	NA	0.0143342	4.17395	0.0414262	12	8.27	82.0823	51.0568	87	90	4.22971	0.00338892	0.986817	0.0097941	0.15227	2.53783	0.456809	365.447	1.65658e+06	0.580934	972320	2.6289e+06
LKA	AS	0.373725	3.92221	0.227126	1829	4.555	169.852	101.696	9867	10396	4.52306	0.0826266	0.867158	0.0502152	0.16283	2.71383	0.48849	59563.2	1.48713e+08	144.521	1.33228e+08	2.81941e+08
LSO	AF	0.0227494	0.12488	0.0212535	296	1.437	117.632	131.893	969	1025	0.168883	0.134705	0.739447	0.125847	0.0060798	0.10133	0.0182394	359.924	283498	0.499629	145305	428803
LTU	EU	0.895914	6.98907	0.0128948	157	15.361	360.295	176.785	1436	1685	7.89788	0.113437	0.88493	0.00163269	0.284324	4.73873	0.852971	8927.76	7.51698e+07	74.3806	2.31236e+08	3.06406e+08
LUX	EU	1.18954	3.76298	0.0160172	28	68.734	80.9737	42.5456	252	254	4.96854	0.239415	0.757361	0.00322373	0.178867	2.98112	0.536602	1001.66	3.77374e+07	1.81008	2.51795e+07	6.29169e+07
LVA	EU	0.804791	3.76686	0.0103374	114	12.873	338.446	164.082	968	1148	4.58199	0.175642	0.822102	0.0022561	0.164952	2.7492	0.494855	3760.9	2.65371e+07	27.6332	7.19927e+07	9.85297e+07
MAC	AS	2.09287	5.89986	0.168051		57.59					8.16078	0.256455	0.722952	0.0205925	0.293788	4.89647	0.881365
MAR	AF	0.0888049	2.73246	0.00511227	3290	4.297	220.221	170.989	15945	16396	2.82638	0.03142	0.966771	0.00180877	0.10175	1.69583	0.305249	66951.2	1.5769e+08	209.918	1.82554e+08	3.40245e+08
MDA	EU	0.473199	1.66099	0.0126058	226	2.785	488.911	345.379	1967	2122	2.14679	0.220422	0.773706	0.00587191	0.0772845	1.28807	0.231853	3493.26	5.33258e+06	42.8894	2.41742e+07	2.95068e+07
MDG	AF	0.339046	0.635975	0.0337484	3607	0.869	119.671	94.7361	10537	10616	1.00877	0.336098	0.630447	0.0334551	0.0363157	0.605261	0.108947	26198.1	1.24788e+07	27.0669	4.76032e+06	1.72391e+07
MDV	AS	0.120763	33.2011	0.212399	35	7.383	204.324	131.326	197	165	33.5342	0.00360117	0.990065	0.00633381	1.20723	20.1205	3.6217	8450.63	3.41982e+07	21.9416	3.27852e+07	6.69834e+07
MEX	SA	0.266769	1.52552	0.0226929	11415	12.429	109.847	71.3662	55825	58266	1.81498	0.146982	0.840515	0.0125031	0.0653393	1.08899	0.196018	149170	1.01624e+09	220.453	5.54535e+08	1.57078e+09
MKD	EU	0.140478	0.772514	0.0106595	114	9.185	152.994	92.2362	1034	1036	0.923652	0.15209	0.836369	0.0115406	0.0332515	0.554191	0.0997544	758.134	3.81686e+06	2.77528	5.15897e+06	8.97584e+06
MLI	AF	1.31266	0.29446	0.237882	3319	0.967	185.074	204.053	7515	7533	1.84501	0.711469	0.159599	0.128933	0.0664202	1.107	0.199261	44089.7	2.33693e+07	63.7569	1.24776e+07	3.58469e+07
MLT	EU	0.728508	3.45192	0.0194856	19	22.643	123.685	80.2595	206	206	4.19991	0.173458	0.821903	0.00463953	0.151197	2.51995	0.453591	574.548	7.13086e+06	2.06515	9.46373e+06	1.65946e+07
MMR	AS	3.1779	4.96723	0.530962	5277	1.442	94.579	82.9519	24399	26200	8.67609	0.366283	0.572519	0.0611983	0.312339	5.20566	0.937018	329643	2.6055e+08	447.871	1.30706e+08	3.91256e+08
MNE	EU	0.392271	1.2367	0.00898537	41	10.165	214.904	119.433	307	316	1.63796	0.239488	0.755026	0.00548572	0.0589665	0.982774	0.176899	483.525	2.69406e+06	2.00648	4.12779e+06	6.82186e+06
MNG	AS	0.00428009	0.104541	0.027702	294	3.62	357.493	218.516	1348	1371	0.136523	0.0313507	0.765739	0.202911	0.00491484	0.0819139	0.0147445	288.992	573425	1.26687	928150	1.50158e+06
MOZ	AF	0.532175	0.948767	0.0911413	4613	0.823	87.329	83.6722	11353	12180	1.57208	0.338516	0.603509	0.0579749	0.056595	0.94325	0.169785	52214.5	2.35544e+07	37.3406	6.21953e+06	2.9774e+07
MRT	AF	0.865394	0.967535	0.179641	601	2.203	186.681	174.766	1746	1747	2.01257	0.429994	0.480746	0.0892596	0.0724525	1.20754	0.217358	8708.79	1.05161e+07	14.9853	6.68122e+06	1.71973e+07
MUS	AF	0.0878489	3.6875	0.219419	82	12.112	166.177	98.8032	618	630	3.99477	0.021991	0.923083	0.0549265	0.143812	2.39686	0.431435	2358.51	1.5658e+07	7.71747	1.89177e+07	3.45757e+07
MWI	AF	1.32091	0.0436478	0.0206511	2874	0.796	109.007	87.017	7153	7384	1.38521	0.953582	0.0315098	0.0149083	0.0498676	0.831127	0.149603	28663.9	1.25063e+07	23.29	3.75198e+06	1.62583e+07
MYS	AS	0.88333	8.18321	0.270281	2374	13.214	201.055	152.584	14550	13658	9.33682	0.0946072	0.876445	0.0289479	0.336125	5.60209	1.00838	159592	1.15592e+09	537.558	1.43759e+09	2.59351e+09
NAM	AF	0.290059	1.82566	0.0181081	304	5.871	159.138	140.652	1025	1094	2.13382	0.135934	0.85558	0.0084862	0.0768177	1.28029	0.230453	4670.51	1.503e+07	7.97484	9.47569e+06	2.45057e+07
NCL	OC	0.277589	3.38562	0.0746887	22	16.932			129	125	3.73789	0.0742635	0.905755	0.0199815	0.134564	2.24274	0.403692	592.082	5.49506e+06
NER	AF	0.566506	0.0224947	0.0483736	3821	0.65	193.657	182.663	8226	8238	0.637375	0.888812	0.0352928	0.0758951	0.0229455	0.382425	0.0688365	17534.9	6.2474e+06	23.4034	3.07871e+06	9.32611e+06
NGA	AF	0.365826	2.33225	0.115922	31181	2.135	193.222	205.776	80160	78344	2.814	0.130002	0.828803	0.0411947	0.101304	1.6884	0.303912	631751	7.39309e+08	1046.2	4.52055e+08	1.19136e+09
NIC	NA	0.0549404	0.581478	0.180549	684	2.499	118.448	95.5139	2869	2953	0.816967	0.0672492	0.711752	0.220999	0.0294108	0.49018	0.0882324	4023.4	5.51114e+06	6.01816	3.04374e+06	8.55487e+06
NLD	EU	0.687341	3.13312	0.0112982	931	37.008	73.2738	39.8048	8285	8399	3.83176	0.17938	0.817672	0.00294855	0.137943	2.29906	0.41383	25685.1	5.21025e+08	42.2736	3.16622e+08	8.37647e+08
NOR	EU	1.23849	6.39865	0.0191564	300	46.745	84.6289	43.1866	2441	2444	7.6563	0.161761	0.835737	0.00250205	0.275627	4.59378	0.82688	16537.6	4.2373e+08	27.6293	2.61386e+08	6.85116e+08
NPL	AS	0.221308	0.0412269	0.361991	3172	1.079	245.995	143.071	13299	13719	0.624526	0.354362	0.0660131	0.579625	0.0224829	0.374716	0.0674488	14263.2	8.43567e+06	38.7487	8.46167e+06	1.68973e+07
NZL	OC	0.466995	2.90726	0.0375357	318	25.386	92.4056	51.9525	2143	2225	3.41179	0.136877	0.852121	0.0110018	0.122824	2.04707	0.368473	7811.63	1.08697e+08	12.5583	6.45213e+07	1.73218e+08
OMN	AS	0.0339492	4.72815	0.221	304	24.563	238.207	163.275	1833	1205	4.9831	0.00681287	0.948837	0.0443498	0.179392	2.98986	0.538175	10907	1.46848e+08	36.8375	1.83125e+08	3.29974e+08
PAK	AS	0.178537	0.0869882	0.0422803	26162	2.411	278.937	203.9	92428	86997	0.307805	0.580032	0.282608	0.13736	0.011081	0.184683	0.033243	57980.2	7.66229e+07	158.967	7.75678e+07	1.54191e+08
PAN	NA	0.127111	2.04966	0.265842	375	12.638	101.433	62.1301	1828	1812	2.44262	0.0520388	0.839126	0.108835	0.0879342	1.46557	0.263802	6595.06	4.56856e+07	8.57259	2.19264e+07	6.76119e+07
PER	SA	0.323542	2.5886	0.199628	3121	8.558	97.3569	62.9235	14474	14554	3.11177	0.103974	0.831874	0.0641526	0.112024	1.86706	0.336071	69925.2	3.28011e+08	85.0015	1.47223e+08	4.75234e+08
PHL	AS	0.613193	3.94328	0.499608	11660	3.56	240.59	162.942	47397	46569	5.05608	0.121278	0.779908	0.0988133	0.182019	3.03365	0.546056	424468	8.28279e+08	1120.42	8.07251e+08	1.63553e+09
PNG	OC	1.81674	3.42658	0.549043	1074	2.217	168.341	112.709	3718	3591	5.79236	0.313644	0.591568	0.0947873	0.208525	3.47542	0.625575	44791.2	5.44302e+07	69.4768	3.11733e+07	8.56035e+07
POL	EU	0.357651	1.48216	0.00455586	2014	17.255	220.839	124.81	18532	19797	1.84437	0.193915	0.803615	0.00247014	0.0663974	1.10662	0.199192	26744.9	2.52951e+08	142.871	4.98927e+08	7.51878e+08
PRK	AS	0.0493177	1.14116	0.311701	1755		189.365	100.408	11996	12552	1.50217	0.0328309	0.759669	0.2075	0.0540783	0.901304	0.162235	18981.5		62.6942
PRT	EU	0.63591	8.12376	0.0663454	514	21.6	62.5476	38.6789	5070	5525	8.82601	0.0720495	0.920433	0.00751703	0.317736	5.29561	0.953209	32663.3	3.86719e+08	53.9432	2.35813e+08	6.22532e+08
PRY	SA	0.626415	0.0755306	0.0201065	705	4.648	132.6	96.6755	3176	3069	0.722053	0.867548	0.104605	0.0278463	0.0259939	0.433232	0.0779817	3665.14	9.33766e+06	6.14175	5.77744e+06	1.51151e+07
PYF	OC	0.541383	7.19227	0.143111	23	16.579			137	130	7.87677	0.0687317	0.9131	0.0181688	0.283564	4.72606	0.850691	1304.39	1.18535e+07
QAT	AS	0.81099	2.13934	0.241445	86	69.79	175.493	132.378	1420	438	3.19177	0.254087	0.670266	0.0756461	0.114904	1.91506	0.344712	1976.35	7.56028e+07	11.5163	1.62661e+08	2.38264e+08
ROU	EU	0.431974	0.684896	0.0104618	1136	10.897	258.795	172.001	9942	10532	1.12733	0.383183	0.607537	0.00928012	0.0405839	0.676399	0.121752	9220.67	5.50746e+07	58.4844	1.2898e+08	1.84055e+08
RUS	EU	3.51655	2.77906	0.00744053	8198	14.096	408.83	211.404	66542	76940	6.30304	0.557912	0.440907	0.00118047	0.22691	3.78183	0.680729	372041	2.87454e+09	3182.98	9.08045e+09	1.1955e+10
RWA	AF	0.295095	0.360397	0.0342298	1706	1.041	73.1583	72.1714	4922	5117	0.689721	0.427847	0.522525	0.0496285	0.02483	0.413833	0.0744899	8471.99	4.83412e+06	5.96185	1.25605e+06	6.09018e+06
SAU	AS	0.782344	1.34491	0.15337	2986	20.535	233.84	169.643	15426	11996	2.28063	0.343039	0.589712	0.0672489	0.0821025	1.36838	0.246308	49031.6	5.5189e+08	151.634	6.30187e+08	1.18208e+09
SDN	AF	0.274345	0.0412913	0.00614761	5993	2.023	318.176	254.809	17231	17313	0.321784	0.852575	0.12832	0.0191048	0.0115842	0.19307	0.0347526	13884.8	1.53964e+07	37.7794	1.54678e+07	3.08641e+07
SEN	AF	0.560359	3.87007	0.294181	2290	1.738	200.427	179.244	6171	6506	4.72461	0.118604	0.81913	0.0622656	0.170086	2.83476	0.510258	77899.3	7.42105e+07	132.63	4.66519e+07	1.20862e+08
SLB	OC	0.00400629	6.26033	0.26091	85	2.431	174.053	129.044	268	262	6.52524	0.000613969	0.959401	0.0399848	0.234909	3.91515	0.704726	3993.45	5.32126e+06	6.09409	2.99827e+06	8.31953e+06
SLE	AF	0.788997	5.4531	0.417883	1227	0.742	277.402	274.472	3193	3224	6.65998	0.118468	0.818786	0.0627454	0.239759	3.99599	0.719278	58836.9	2.39296e+07	136.821	2.05463e+07	4.44759e+07
SLV	NA	0.131378	1.11136	0.0418084	625	5.978	135.369	101.544	2925	3257	1.28455	0.102276	0.865177	0.0325472	0.0462437	0.770729	0.138731	5780.47	1.89409e+07	11.0389	1.33554e+07	3.22963e+07
SOM	AF	0.00775474	0.508151	0.066388	2558	0.034	135.077	134.513	6018	6027	0.582294	0.0133176	0.872671	0.114011	0.0209626	0.349376	0.0628877	10724.5	199865	11.2083	77124.8	276989
SRB	EU	0.450086	0.598811	0.00548543	497	7.1	164.898	105.011	4405	4586	1.05438	0.426872	0.567926	0.00520251	0.0379577	0.632629	0.113873	3773	1.46834e+07	15.0743	2.16606e+07	3.6344e+07
SSD	AF	1.59459	0.239818	0.0276726	1678	0.956824	111.861	100.546	4752	4756	1.86208	0.856349	0.12879	0.0148611	0.067035	1.11725	0.201105	22497	1.17988e+07	22.1898	4.29698e+06	1.60958e+07
STP	AF	0.0417699	4.80538	0.122037	32	1.758	88.6889	89.6386	90	89	4.96918	0.00840578	0.967035	0.0245588	0.178891	2.98151	0.536672	1144.9	1.10323e+06	0.92568	329349	1.43258e+06
SUR	SA	0.157969	2.91059	0.287668	54	7.105	171.964	96.2731	266	261	3.35623	0.0470675	0.867221	0.0857117	0.120824	2.01374	0.362472	1304.9	5.08187e+06	2.79218	4.01499e+06	9.09686e+06
SVK	EU	0.373405	1.0919	0.0111246	281	20.043	292.353	182.506	2619	2782	1.47643	0.252911	0.739555	0.00753477	0.0531515	0.885858	0.159455	2987.11	3.28168e+07	22.2184	9.01265e+07	1.22943e+08
SVN	EU	0.384797	1.17961	0.014479	102	25.281	101.147	58.0103	1014	1031	1.57888	0.243715	0.747115	0.00917039	0.0568397	0.947329	0.170519	1159.53	1.60679e+07	3.02855	1.54955e+07	3.15634e+07
SWE	EU	1.69145	3.91647	0.0249748	547	33.762	102.573	55.9226	4675	4712	5.6329	0.300281	0.695285	0.00443373	0.202784	3.37974	0.608353	22184.6	4.10546e+08	48.738	3.33022e+08	7.43567e+08
SWZ	AF	0.109172	0.157892	0.0798343		4.754	129.083	133.024			0.346898	0.314709	0.455154	0.230137	0.0124883	0.208139	0.037465
SYR	AS	0.390734	0.710217	0.00933047	2978	4.749	340.877	264.796	10784	10579	1.11028	0.351924	0.639673	0.0084037	0.0399701	0.666169	0.11991	23806.2	6.19689e+07	85.0993	8.17909e+07	1.4376e+08
TCD	AF	0.26915	0.0143096	0.040178	2648	1.337	198.7	154.604	5963	5990	0.323638	0.83164	0.0442149	0.124145	0.011651	0.194183	0.0349529	6170.35	4.52192e+06	8.10676	2.19359e+06	6.71551e+06
TGO	AF	0.27896	1.72651	0.0983825	1156	0.898	242.378	205.535	3186	3236	2.10385	0.132595	0.820642	0.0467631	0.0757386	1.26231	0.227216	17510.8	8.61912e+06	35.6562	6.48019e+06	1.50993e+07
THA	AS	1.71198	1.65377	0.500532	4093	7.673	84.5579	59.7131	32932	34262	3.86628	0.442797	0.427742	0.129461	0.139186	2.31977	0.417559	113938	4.79198e+08	218.845	3.39843e+08	8.19041e+08
TJK	AS	0.0184762	0.0524929	0.029288	1101	1.938	320.464	251.976	3798	3728	0.100257	0.184288	0.523583	0.292129	0.00360925	0.0601542	0.0108278	794.758	844248	2.56758	1.00706e+06	1.85131e+06
TKM	AS	0.628006	0.137611	0.0469417	575	7.422	465.438	291.037	2505	2584	0.812559	0.772875	0.169355	0.0577703	0.0292521	0.487535	0.0877564	3363.99	1.36854e+07	18.461	2.77301e+07	4.14156e+07
TTO	NA	0.0940259	3.82017	0.0749962	101	23.176	186.954	114.811	659	669	3.98919	0.0235702	0.95763	0.0187998	0.143611	2.39352	0.430833	2900.94	3.68518e+07	9.34535	4.3834e+07	8.06858e+07
TUN	AF	0.0249437	2.31569	0.00440787	882	8.564	247.662	152.492	5302	5333	2.34504	0.0106368	0.987484	0.00187966	0.0844214	1.40702	0.253264	14891.9	6.99052e+07	58.7456	1.01819e+08	1.71724e+08
TUR	AS	0.192307	0.72579	0.027916	6546	12.542	189.868	100.719	35563	36762	0.946013	0.203281	0.76721	0.0295091	0.0340565	0.567608	0.102169	44586.7	3.06517e+08	117.104	2.97245e+08	6.03762e+08
TWN	AS	0.843949	1.82058	0.197184		32.27					2.86171	0.294911	0.636185	0.0689041	0.103022	1.71703	0.309065
TZA	AF	0.685985	0.165027	0.083395	8555	1.255	120.63	108.534	22120	22229	0.934407	0.734139	0.176612	0.0892491	0.0336387	0.560644	0.100916	57555.7	3.95926e+07	56.2147	1.42781e+07	5.38707e+07
UGA	AF	0.987035	0.0093374	0.0213618	6925	1.149	98.2868	87.2223	15916	16514	1.01773	0.969836	0.0091747	0.0209896	0.0366384	0.610641	0.109915	50744.2	3.19586e+07	36.1977	8.41739e+06	4.0376e+07
UKR	EU	0.235014	2.32337	0.0128997	2402	6.079	541.037	322.863	21137	24657	2.57128	0.0913998	0.903583	0.00501686	0.0925661	1.54277	0.277698	44468.7	1.48173e+08	587.112	7.2232e+08	8.70493e+08
UNK	EU	0.264003	0.770471	0.0104931							1.04497	0.252642	0.737316	0.0100416	0.0376188	0.62698	0.112856
URY	SA	0.19082	0.854236	0.0659091	242	12.595	105.054	52.8484	1619	1743	1.11097	0.171761	0.768913	0.059326	0.0399948	0.666579	0.119984	1935.75	1.33637e+07	3.44689	8.78622e+06	2.215e+07
USA	NA	0.930528	2.36885	0.0795842	20856	42.164	111.451	61.9503	152610	156401	3.37896	0.275389	0.701059	0.0235528	0.121643	2.02738	0.364928	507396	1.17266e+10	1058.89	9.03589e+09	2.07625e+10
UZB	AS	0.0510616	0.0443595	0.0165041	3082	2.866	423.034	286.671	14182	14331	0.111925	0.456212	0.396332	0.147457	0.00402931	0.0671551	0.0120879	2483.66	3.90167e+06	13.4346	7.79252e+06	1.16942e+07
VCT	NA	0.0211628	3.08093	0.13049	9	9.514	155.043	143.687	53	53	3.23258	0.00654673	0.953086	0.0403671	0.116373	1.93955	0.349119	209.471	1.09237e+06	0.601073	1.15736e+06	2.24973e+06
VEN	SA	0.289055	1.39821	0.113486	2947	10.918	184.096	97.2793	14190	14248	1.80075	0.160519	0.77646	0.0630214	0.0648271	1.08045	0.194481	38209.1	2.28661e+08	84.9898	1.87796e+08	4.16457e+08
VNM	AS	1.75264	2.16164	0.261336	7380	2.845	99.5319	46.7455	43748	44220	4.17562	0.419731	0.517683	0.0625861	0.150322	2.50537	0.450967	221876	3.45998e+08	313.849	1.80709e+08	5.26707e+08
VUT	OC	0.0399719	5.99342	0.188968	36	3.988	202.754	155.735	119	116	6.22236	0.0064239	0.963207	0.0303692	0.224005	3.73342	0.672015	1612.84	3.52555e+06	3.05082	2.46234e+06	5.98789e+06
WSM	OC	0.448915	7.70453	0.0419763	27	3.945	183.175	88.2426	96	90	8.19542	0.0547763	0.940102	0.00512192	0.295035	4.91725	0.885106	1593.19	3.44506e+06	2.41411	1.92744e+06	5.3725e+06
YEM	AS	0.00776409	0.507271	0.066514	3825	2.373	406.61	319.705	11671	11484	0.581549	0.0133507	0.872276	0.114374	0.0209358	0.34893	0.0628073	16015.9	2.0832e+07	58.0313	2.787e+07	4.87019e+07
ZAF	AF	0.043175	1.01381	0.0700465	5831	9.47	160.315	103.534	25268	25949	1.12703	0.0383086	0.89954	0.0621514	0.0405731	0.676219	0.121719	47316.4	2.45608e+08	89.8474	1.722e+08	4.17808e+08
ZMB	AF	1.20831	0.111149	0.0123668	2700	1.384	113.809	103.239	6719	6886	1.33183	0.907258	0.0834559	0.00928562	0.0479457	0.799095	0.143837	25890.7	1.96409e+07	23.2364	6.50851e+06	2.61494e+07
ZWE	AF	0.350429	0.117184	0.032211	2181	0.415	91.7561	126.176	6050	6647	0.499824	0.701105	0.23445	0.0644447	0.0179937	0.299894	0.053981	7848.83	1.7854e+06	8.26161	693888	2.47929e+06
